# Supplementary material for: Pooled analysis of pralatrexate single-agent studies in patients with relapsed/refractory peripheral T-cell lymphoma
Source: PubMed Central journal article supplement — Blood Adv. 2024 Mar 3;8(11):2601–11. doi: 10.1182/bloodadvances.2023010441 (PMC11157204; doi:10.1182/bloodadvances.2023010441), 2024-03-03
Supplement: BLOODA_ADV-2023-010441-mmc1.pdf [file BLOODA_ADV-2023-010441-mmc1.pdf]

## Supplemental Tables and Figures

Supplemental Figure 1. Disposition of patients in studies included in pooled analysis<sup>1-4</sup>

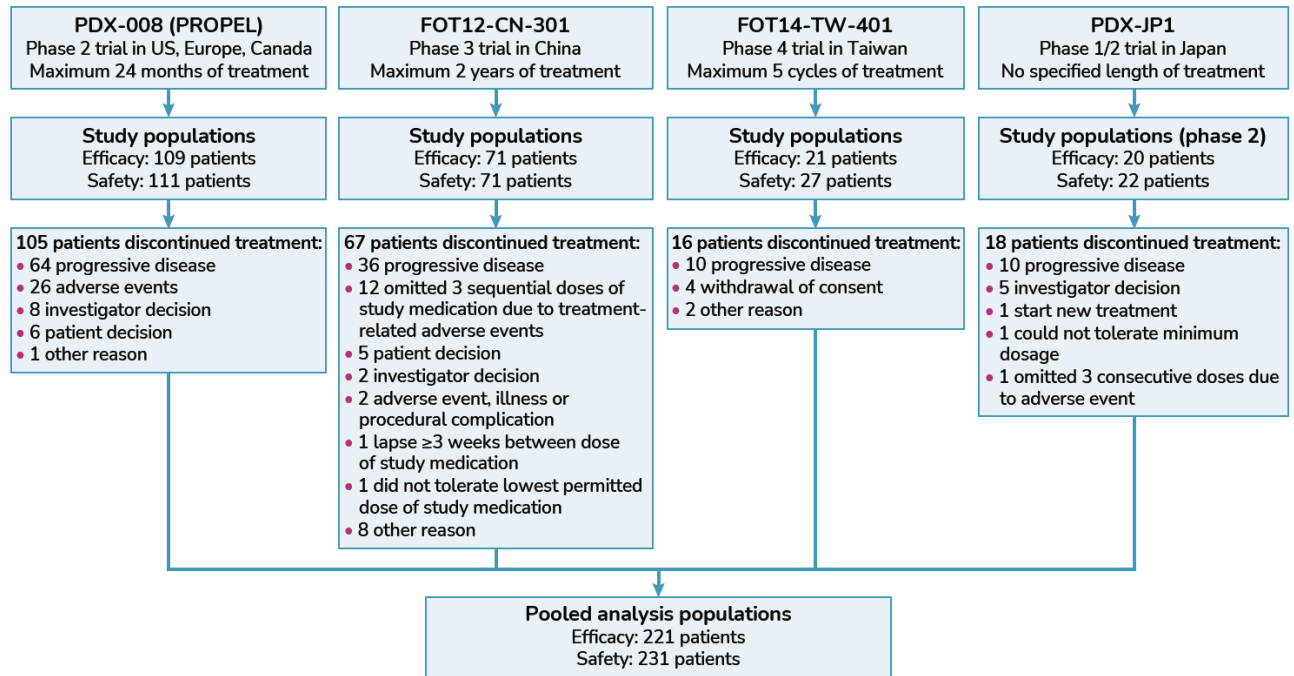

Supplemental Table 1. Characteristics of included studies

|                                   | PDX-008 [PROPEL] <sup>1</sup>                                                                                                                                                                               | FOT12-CN-301 <sup>2</sup>                                                                                                                                                                                                                                  | FOT14-TW-401 <sup>3</sup>                                                                                                                                                                        | PDX-JP1 <sup>4</sup>                                                                                                                                                                                                                                       |
|-----------------------------------|-------------------------------------------------------------------------------------------------------------------------------------------------------------------------------------------------------------|------------------------------------------------------------------------------------------------------------------------------------------------------------------------------------------------------------------------------------------------------------|--------------------------------------------------------------------------------------------------------------------------------------------------------------------------------------------------|------------------------------------------------------------------------------------------------------------------------------------------------------------------------------------------------------------------------------------------------------------|
| Phase                             | 2                                                                                                                                                                                                           | 3                                                                                                                                                                                                                                                          | 4                                                                                                                                                                                                | 2                                                                                                                                                                                                                                                          |
| Trial identifier                  | NCT00364923                                                                                                                                                                                                 | NCT03349333                                                                                                                                                                                                                                                | NCT03150602                                                                                                                                                                                      | NCT02013362                                                                                                                                                                                                                                                |
| Country/regions                   | US, Europe, Canada                                                                                                                                                                                          | China                                                                                                                                                                                                                                                      | Taiwan                                                                                                                                                                                           | Japan                                                                                                                                                                                                                                                      |
| Included population               | ≥ 18 years old; PTCL with disease progression after ≥1 prior treatment                                                                                                                                      | ≥ 18 years old; PTCL with disease progression after ≥1 prior systemic therapy and enlarged lymph node or extranodal mass                                                                                                                                   | ≥ 20 years old; PTCL with disease progression after prior treatment                                                                                                                              | ≥ 20 years old; PTCL with relapsed or refractory disease after at least 1 prior antitumor therapy                                                                                                                                                          |
| Included histologies              | AITL, ATL (HTLV-1+), blastic NK lymphoma, ENKTL unspecified, EATL, HSTCL, MF, PTCL NOS, SPTCL, T/NK cell leukemia/lymphoma, T-NK-cell lymphoma nasal                                                        | Aggressive NK-cell leukemia, AITL, ALCL, ATL (HTLV-1+), EATL, ENKTL nasal type, HSTCL, PTCL NOS, SPTCL, tMF                                                                                                                                                | AITL, ATL (HTLV 1+), ENKL nasal type, EATL, HSTCL, PTCL NOS, SPTCL                                                                                                                               | Aggressive NK-cell leukemia, AITL, ALCL, EATL, ENKTL nasal type, HSTCL, PTCL NOS, SPTCL, tMF                                                                                                                                                               |
| Excluded TCL histologic subtypes  | CD30+ pcALCL, lymphomatoid papulosis, non-tMF, precursor T/NK neoplasms (except blastic NK lymphoma), Sézary syndrome, T-LGLL, T-PLL                                                                        | CD30+ pcALCL, lymphoid papulosis, non-tMF, precursor TCL or leukemia, Sézary syndrome, T-LGLL, T-PLL                                                                                                                                                       | ALCL (ALK±), CD30+ pcALCL and lymphomatoid papulosis, ENKTCL nasal type with local recurrence, MF and tMF, precursor T/NK neoplasms (except blastic NK lymphoma), Sézary syndrome, T-LGLL, T-PLL | ATL (HTLV 1+)                                                                                                                                                                                                                                              |
| Additional key exclusion criteria | Prior SCT; major surgery ≤2 weeks of study entry; investigational drugs, biologics, or devices as the only prior therapy; any conventional chemotherapy or radiation therapy ≤4 week before study treatment | Prior allogeneic SCT or autologous SCT ≤100 days of study start; Investigational drugs or biologics ≤4 weeks of study start; CHF, uncontrolled infection unstable cardiac disease, or other serious illness that could impair adherence to study treatment | Not reported                                                                                                                                                                                     | Prior allogeneic SCT; antibody therapy or autologous SCT ≤100 days; prior pralatrexate; prior chemotherapy, high-dose systemic corticosteroid (>10 mg/day prednisolone or equivalent), radiation therapy, phototherapy, or electron beam therapy ≤21 days; |

|                                    |                                                                                                                                                                                                                       |                    |                                                                                                                                      |                                                                                                                   |
|------------------------------------|-----------------------------------------------------------------------------------------------------------------------------------------------------------------------------------------------------------------------|--------------------|--------------------------------------------------------------------------------------------------------------------------------------|-------------------------------------------------------------------------------------------------------------------|
| Enrollment period                  | Aug 2006-Apr 2008                                                                                                                                                                                                     | Sept 2015-Jul 2017 | Aug 2016-Dec 2017                                                                                                                    | Mar 2014-Sept 2015                                                                                                |
| Maximum allowed treatment duration | Up to 24 months                                                                                                                                                                                                       | 2 years            | Up to 5 cycles                                                                                                                       | Not specified                                                                                                     |
| Efficacy population                | N=109 and included all evaluable patients, defined as those who had received $\geq$ least 1 dose of pralatrexate and the diagnosis of an allowed PTCL histopathological subtype confirmed by central pathology review | N=71               | N=21 patients who had completed $\geq$ 1 cycle of pralatrexate treatment and who had $\geq$ 1 post-treatment tumor assessment result | N=20 patients who had received any pralatrexate and with efficacy data obtained after pralatrexate administration |
| Safety population, <i>n</i>        | 111                                                                                                                                                                                                                   | 71                 | 27                                                                                                                                   | 22                                                                                                                |
| Study assessments                  |                                                                                                                                                                                                                       |                    |                                                                                                                                      |                                                                                                                   |

AITL, angioimmunoblastic T-cell lymphoma; ALCL, anaplastic large cell lymphoma; ATL, adult T-cell leukemia/lymphoma; CHF, cardiac heart failure; EATL, enteropathy-associated T-cell lymphoma; ENKTL, extranodal NK/T-cell lymphoma; HSCTCL, hepatosplenic T-cell lymphoma; HTLB-1, human T-lymphotropic virus 1; MF, mycosis fungoides; pc, primary cutaneous; PTCL-NOS, peripheral T-cell lymphoma not otherwise specified; T-PLL, T-cell prolymphocytic leukemia; SCT, stem cell transplantation; SPTCL, subcutaneous panniculitis T-cell lymphoma; T-LGLL, T-cell large granular lymphocytic leukemia; tMF, transformed mycosis fungoides.

Supplemental Table 2. Baseline demographic and disease characteristics by study

| Characteristic            | PDX-008<br>[PROPEL] <sup>1</sup><br>N = 111 | FOT12-CN-<br>301 <sup>2</sup><br>N = 71 | FOT14-TW-<br>401 <sup>3</sup><br>N = 21 | PDX-JP1 <sup>4</sup><br>[Phase 2 only]<br>N = 22 |
|---------------------------|---------------------------------------------|-----------------------------------------|-----------------------------------------|--------------------------------------------------|
| Age, median years (range) | 58(21-85)                                   | 56 (22-77)                              | 57 (28-89)                              | 72 (42-83)                                       |
| Age group, n (%)          |                                             |                                         |                                         |                                                  |
| < 65 years                | 71 (64)                                     | -                                       | -                                       | 4 (18)                                           |
| ≥ 65 years                | 40 (36)                                     | -                                       | -                                       | 18 (82)                                          |
| Gender, n (%)             |                                             |                                         |                                         |                                                  |
| Female                    | 35 (32)                                     | 24 (34)                                 | 7 (33)                                  | 8 (36)                                           |
| Male                      | 76 (68)                                     | 47 (66)                                 | 14 (67)                                 | 14 (64)                                          |
| Race/ethnicity, n (%)     |                                             |                                         |                                         |                                                  |
| African American          | 14 (13)                                     | -                                       | -                                       | -                                                |
| Asian                     | 6 (5)                                       | 71 (100)                                | 21 (100)                                | 22 (100)                                         |
| Hispanic                  | 9 (8)                                       | -                                       | -                                       | -                                                |
| White                     | 80 (72)                                     | -                                       | -                                       | -                                                |
| Other                     | 1 (<1)                                      | -                                       | -                                       | -                                                |
| Unknown                   | 1 (<1)                                      | -                                       | -                                       | -                                                |
| Histologic subtype, n (%) |                                             |                                         |                                         |                                                  |
| PTCL-NOS                  | 59 (43)                                     | 34 (48)                                 | 5 (24)                                  | 10 (45)                                          |
| AITL                      | 13 (12)                                     | 20 (28)                                 | 7 (33)                                  | 9 (41)                                           |
| ALCL, ALK negative        | 11 (10)                                     | 6 (9)                                   | -                                       | 1 (5)                                            |
| ALCL, ALK positive        | 4 (4)                                       | 2 (3)                                   | -                                       | -                                                |

| Characteristic                                                | PDX-008               | FOT12-CN-        | FOT14-TW-        | PDX-JP1 <sup>4</sup> |
|---------------------------------------------------------------|-----------------------|------------------|------------------|----------------------|
|                                                               | [PROPEL] <sup>1</sup> | 301 <sup>2</sup> | 401 <sup>3</sup> | [Phase 2 only]       |
|                                                               | N = 111               | N = 71           | N = 21           | N = 22               |
| ALCL, undetermined ALK status                                 | 2 (2)                 | -                | -                | -                    |
| tMF                                                           | 12 (11)               | -                | -                | -                    |
| ENKTL nasal type                                              | 2 (2)                 | 5 (7)            | 6 (29)           | -                    |
| Blastic NK lymphoma                                           | 4 (4)                 | -                | -                | -                    |
| Adult TCL/leukemia HTLV1+                                     | 1 (<1)                | 1 (1)            | 1 (5)            | -                    |
| Subcutaneous panniculitis-like<br>TCL                         | -                     | 1 (1)            | 1 (5)            | -                    |
| Enteropathy-associated TCL                                    | -                     | 1 (1)            | 1 (5)            | -                    |
| Extranodal peripheral NK/T-cell<br>lymphoma unspecified       | 1 (<1)                | -                | -                | -                    |
| Other                                                         | 2 (2)                 | 1 (1)            | -                | 2 (9)                |
| Lines of prior systemic therapies<br>for MTCL, median (range) | 3 (1-12)              | 2 (1-14)         | 1 (1-3)          | 2 (1-8)              |
| Prior treatment for MTCL, n (%)                               |                       |                  |                  |                      |
| Chemotherapy                                                  | 111 (100)             | 71 (100)         | -                | -                    |
| Stem cell transplantation                                     | 18 (16)               | 7 (10)           | -                | -                    |
| Radiation therapy                                             | 25 (23)               | 16 (23)          | -                | -                    |
| Photopheresis                                                 | 10 (9)                | -                | -                | -                    |
| Systemic investigational agents                               | 7 (6)                 | -                | -                | -                    |
| Topical nitrogen mustard                                      | 4 (4)                 | -                | -                | -                    |

| Characteristic                                    | PDX-008<br>[PROPEL] <sup>1</sup><br>N = 111 | FOT12-CN-<br>301 <sup>2</sup><br>N = 71 | FOT14-TW-<br>401 <sup>3</sup><br>N = 21 | PDX-JP1 <sup>4</sup><br>[Phase 2 only]<br>N = 22 |
|---------------------------------------------------|---------------------------------------------|-----------------------------------------|-----------------------------------------|--------------------------------------------------|
| Other therapy                                     | 13 (12)                                     | 6 (9)                                   | -                                       | -                                                |
| Best response to most recent prior regimen, n (%) |                                             |                                         |                                         |                                                  |
| CR                                                | -                                           | 11 (16)                                 | -                                       | 7 (32)                                           |
| CRu                                               | -                                           | 1 (1)                                   | -                                       | -                                                |
| PR                                                | -                                           | 12 (17)                                 | -                                       | 3 (14)                                           |
| SD                                                | -                                           | 6 (9)                                   | -                                       | 5 (23)                                           |
| PD                                                | -                                           | 10 (14)                                 | -                                       | 2 (9)                                            |
| Not available/not evaluable                       | -                                           | 31 (44)                                 | -                                       | 5 (23)                                           |
| ECOG performance status, n (%)                    |                                             |                                         |                                         |                                                  |
| 0                                                 | -                                           | 18 (25)                                 | 9 (43)                                  | 11 (50)                                          |
| 1                                                 | -                                           | 49 (69)                                 | 10 (48)                                 | 11 (50)                                          |
| 2                                                 | -                                           | 4 (6)                                   | 2 (10)                                  | 0                                                |
| LDH level, n (%)                                  |                                             |                                         |                                         |                                                  |
| High (>ULN)                                       | -                                           | 25 (35)                                 | -                                       | 11 (50)                                          |
| Normal/low (≤ULN)                                 | -                                           | 46 (65)                                 | -                                       | 11 (50)                                          |

AITL, angioimmunoblastic T-cell lymphoma; ALCL, anaplastic large cell lymphoma; CR, complete response; ECOG, Eastern Cooperative Oncology Group; ENKTCL, extranodal NK/T cell lymphoma; HTLV, human T-cell leukemia virus; LDH, lactate dehydrogenase; MTCL, mature NK and T-cell lymphoma; PD, progressive disease; PR, partial response; PTCL-NOS, peripheral T-cell

lymphoma, not otherwise specified; SD, stable disease; tMF, transformed mycosis fungoides; u, unconfirmed; ULN, upper limit of normal.

## References

1. O'Connor OA, Pro B, Pinter-Brown L, et al. Pralatrexate in patients with relapsed or refractory peripheral T-cell lymphoma: results from the pivotal PROPEL study. *J Clin Oncol*. 2011;29(9):1182-1189. <https://www.ncbi.nlm.nih.gov/pubmed/21245435>
2. Hong X, Song Y, Huang H, et al. Pralatrexate in Chinese patients with relapsed or refractory peripheral T-cell lymphoma: a single-arm, multicenter study. *Target Oncol*. 2019;14(2):149-158. <https://www.ncbi.nlm.nih.gov/pubmed/30904980>
3. Wang M-C, Ko B-S, Chiou T-J, et al. Interim update from a multi-center study of pralatrexate in Asian patients with relapsed or refractory (R/R) peripheral T-cell lymphoma (PTCL). 24th European Hematology Association Congress; 2019.
4. Maruyama D, Nagai H, Maeda Y, et al. Phase I/II study of pralatrexate in Japanese patients with relapsed or refractory peripheral T-cell lymphoma. *Cancer Sci*. 2017;108(10):2061-2068. <https://www.ncbi.nlm.nih.gov/pubmed/28771889>
